# Supplementary material for: Synthesis and biological activity of optimized belactosin C congeners
Source: Royal Society of Chemistry journal article supplement (doi:10.1039/c1ob05661a), 2011-01-01

## Supporting Information

# Synthesis and Biological Activity of Optimized Belactosin C Congeners

Vadim S. Korotkov,<sup>a</sup> Antje Ludwig,<sup>b</sup> Oleg V. Larionov,<sup>a</sup> Alexander V. Lygin,<sup>a</sup>  
Michael Groll<sup>c</sup> and Armin de Meijere<sup>a\*</sup>

<sup>a</sup> *Institut für Organische und Biomolekulare Chemie der Georg-August-Universität  
Göttingen,*

*Tammannstrasse 2, D-37077 Göttingen, Germany*

<sup>b</sup> *Charité Universitätsmedizin Berlin CCM Med. Klinik für Kardiologie und Angiologie  
Kardiologisches Forschungslabor*

*Ziegelstrasse 5-9, D-10117 Berlin, Germany*

<sup>c</sup> *Center for Integrated Protein Science at the Department Chemie, Lehrstuhl für Biochemie,  
Technische Universität München, Garching, D-85747, Germany*

E-mail: Armin.deMeijere@chemie.uni-goettingen.de

## Content

NMR Spectra of New Compounds

S2

## Spectra of New Compounds

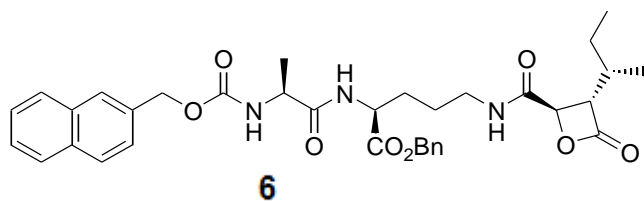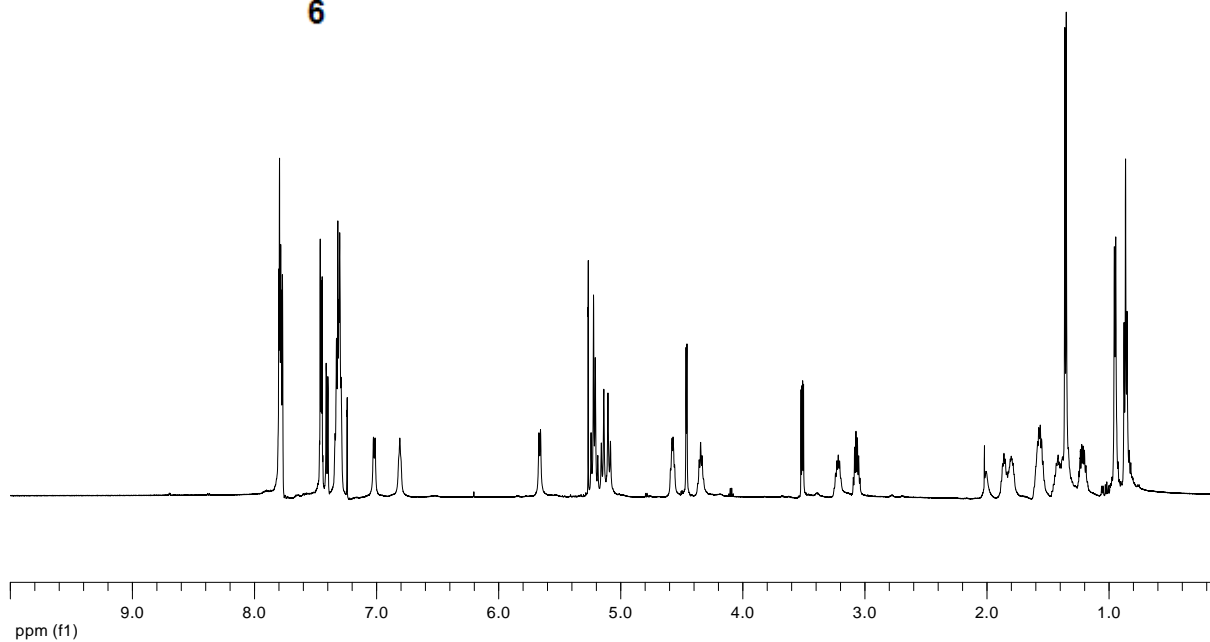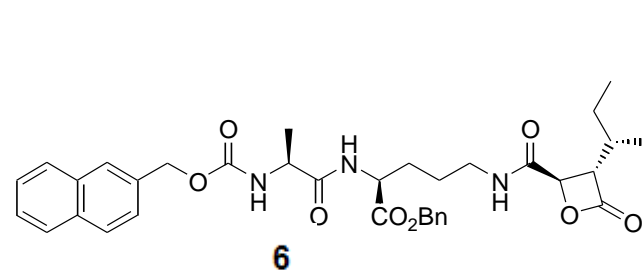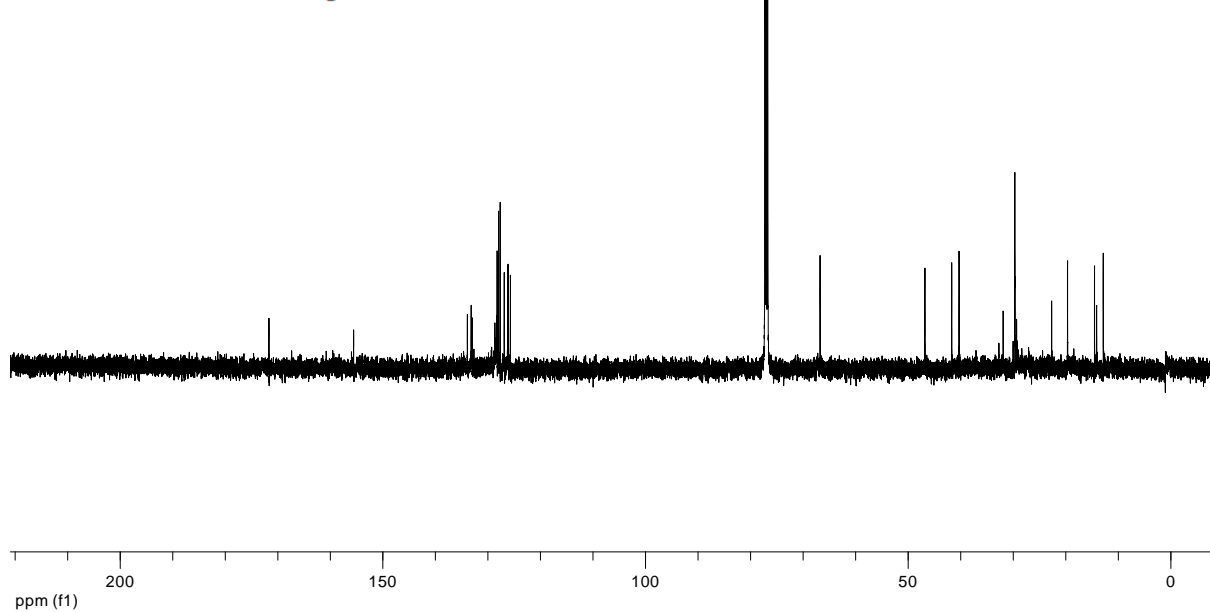

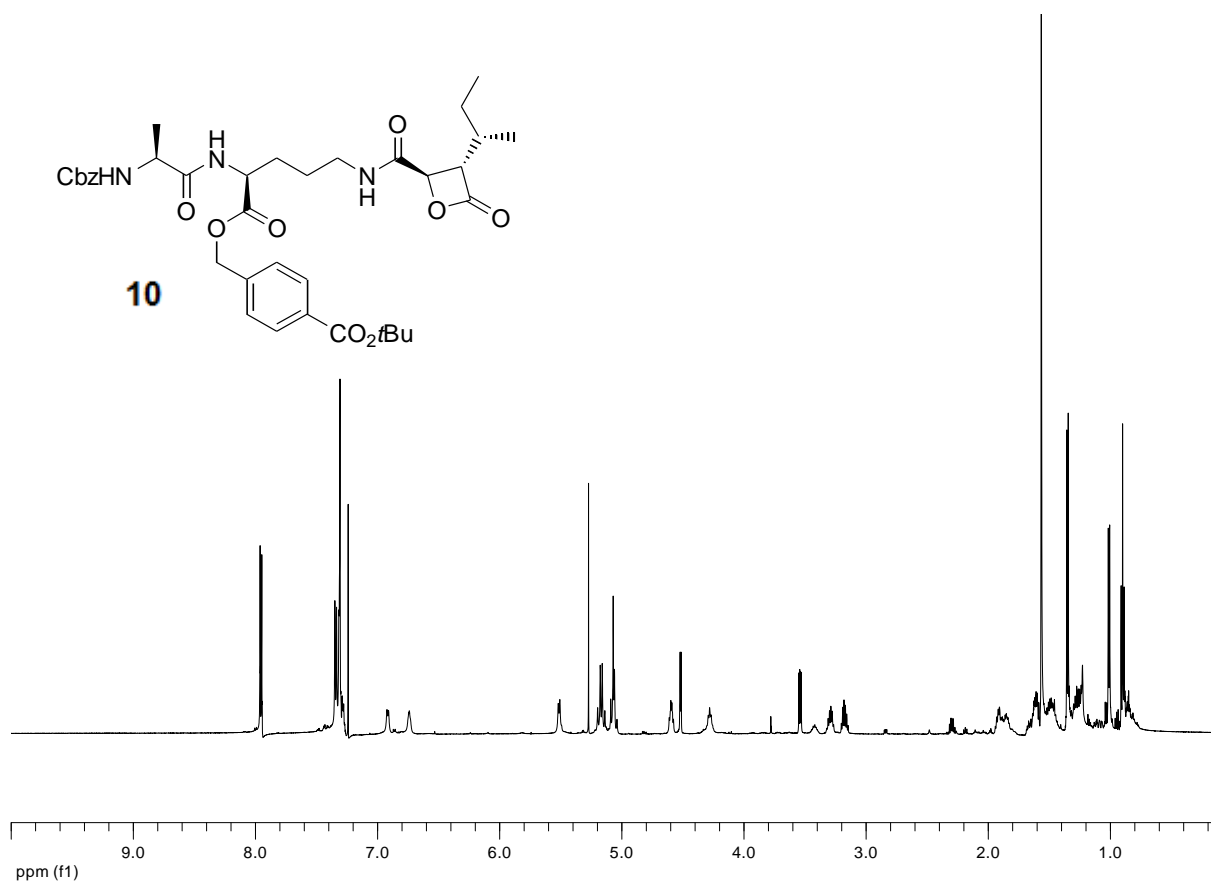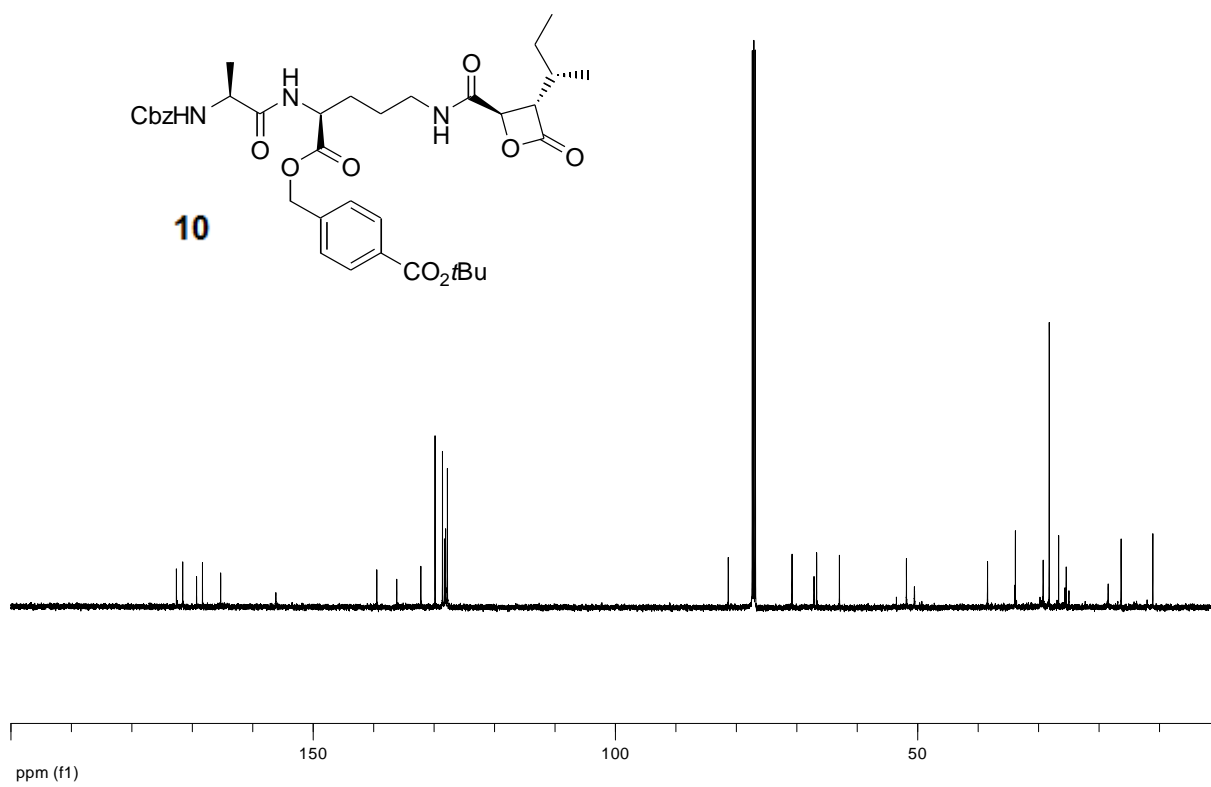

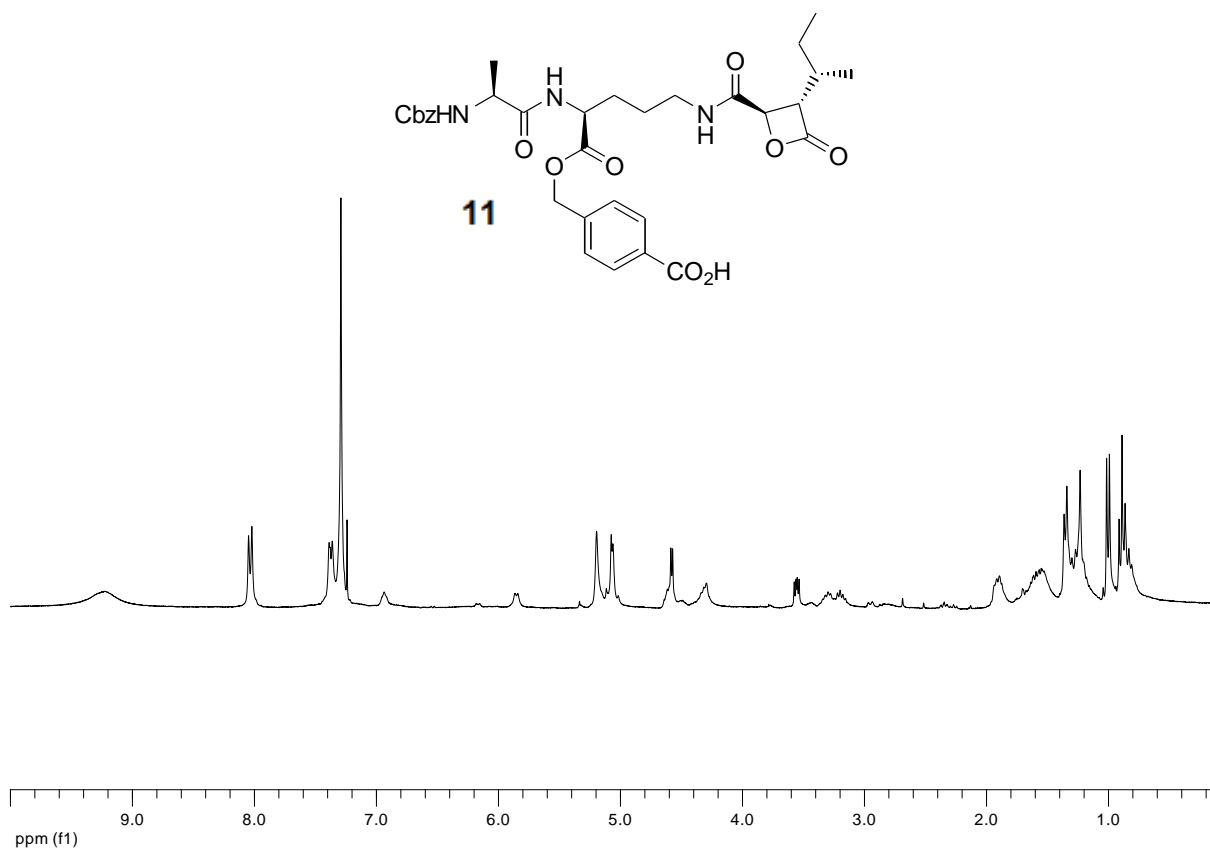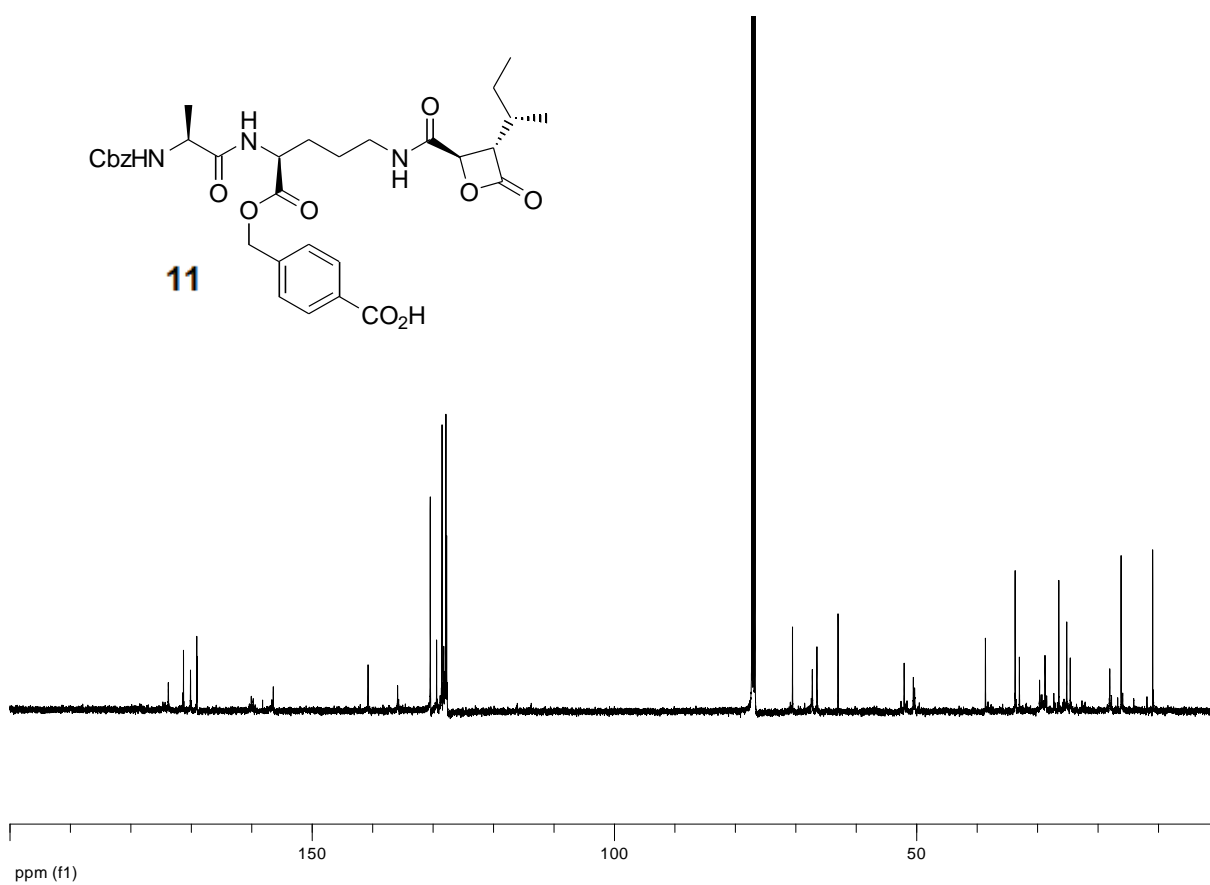

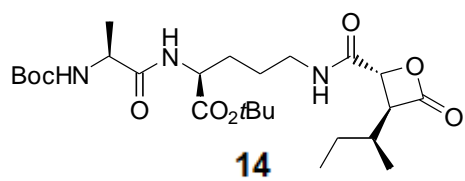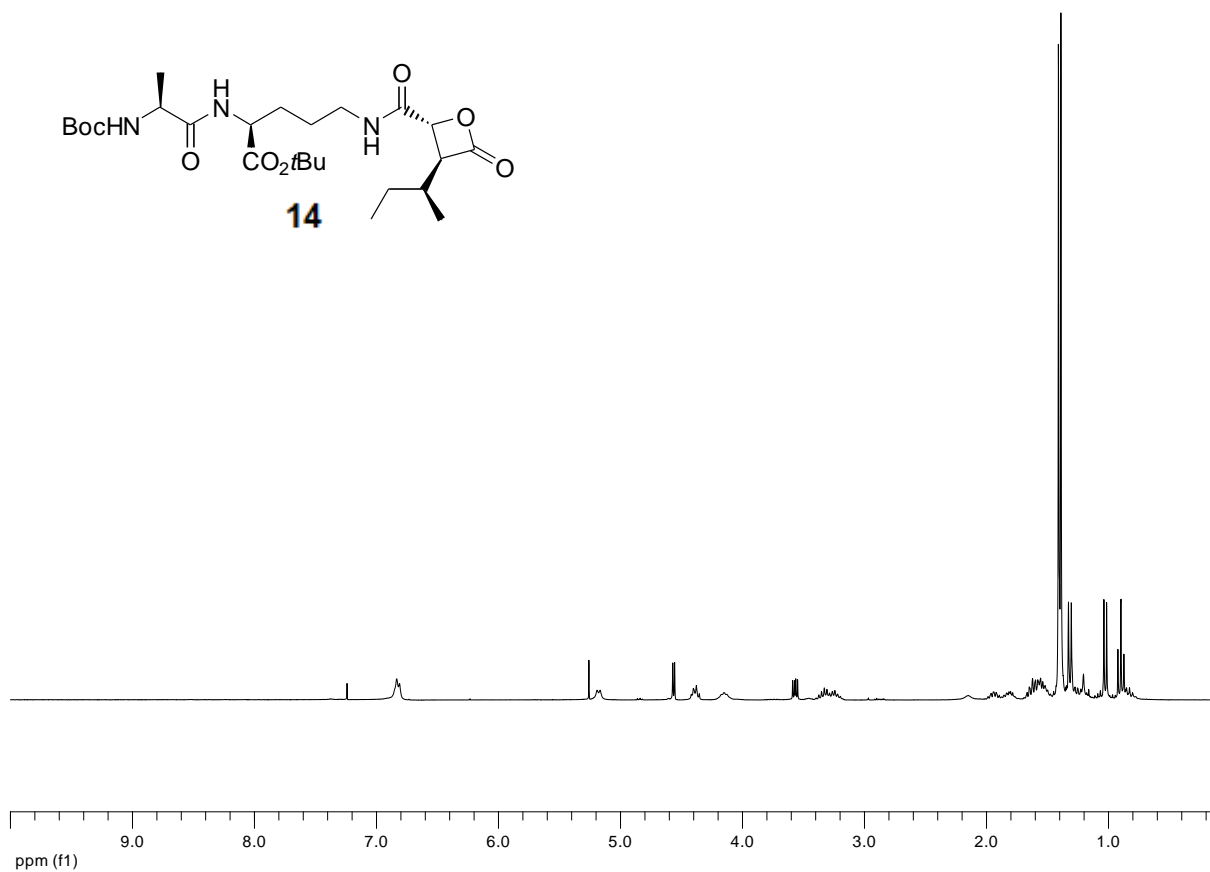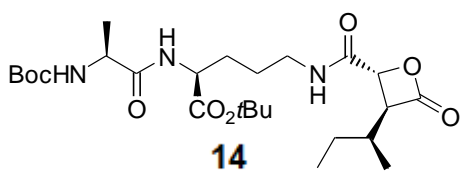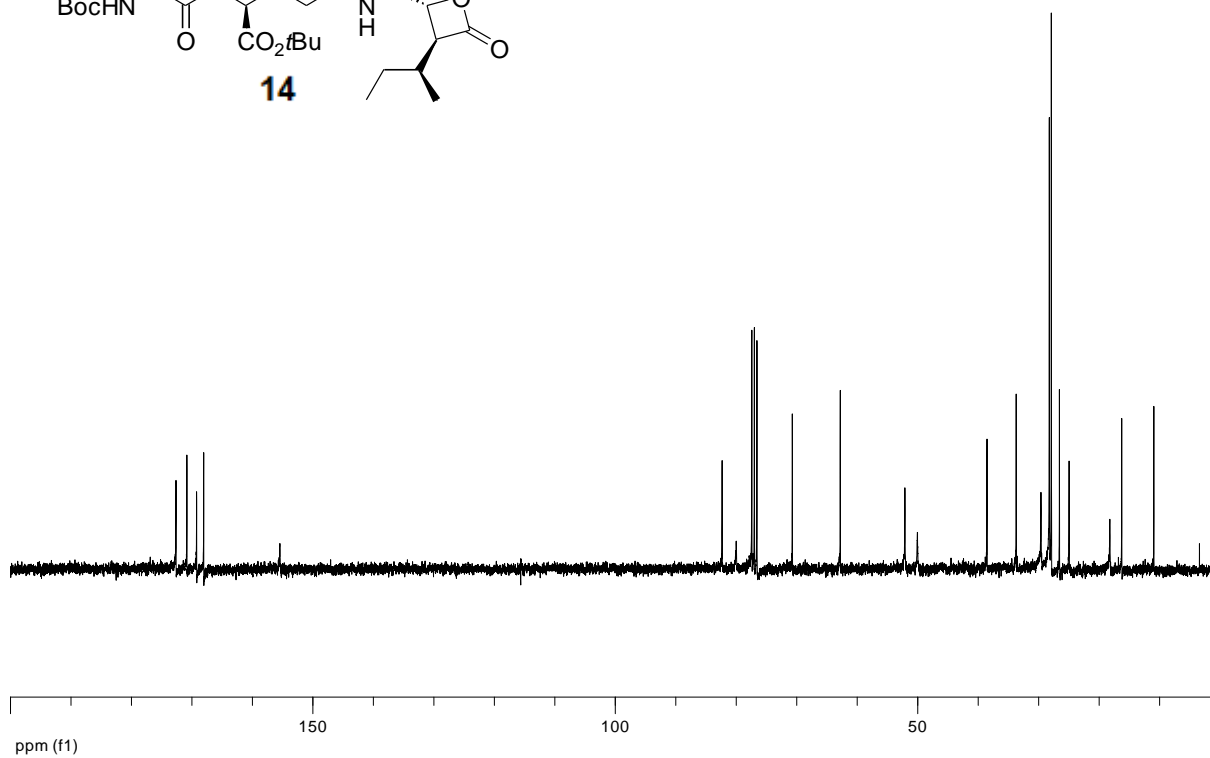

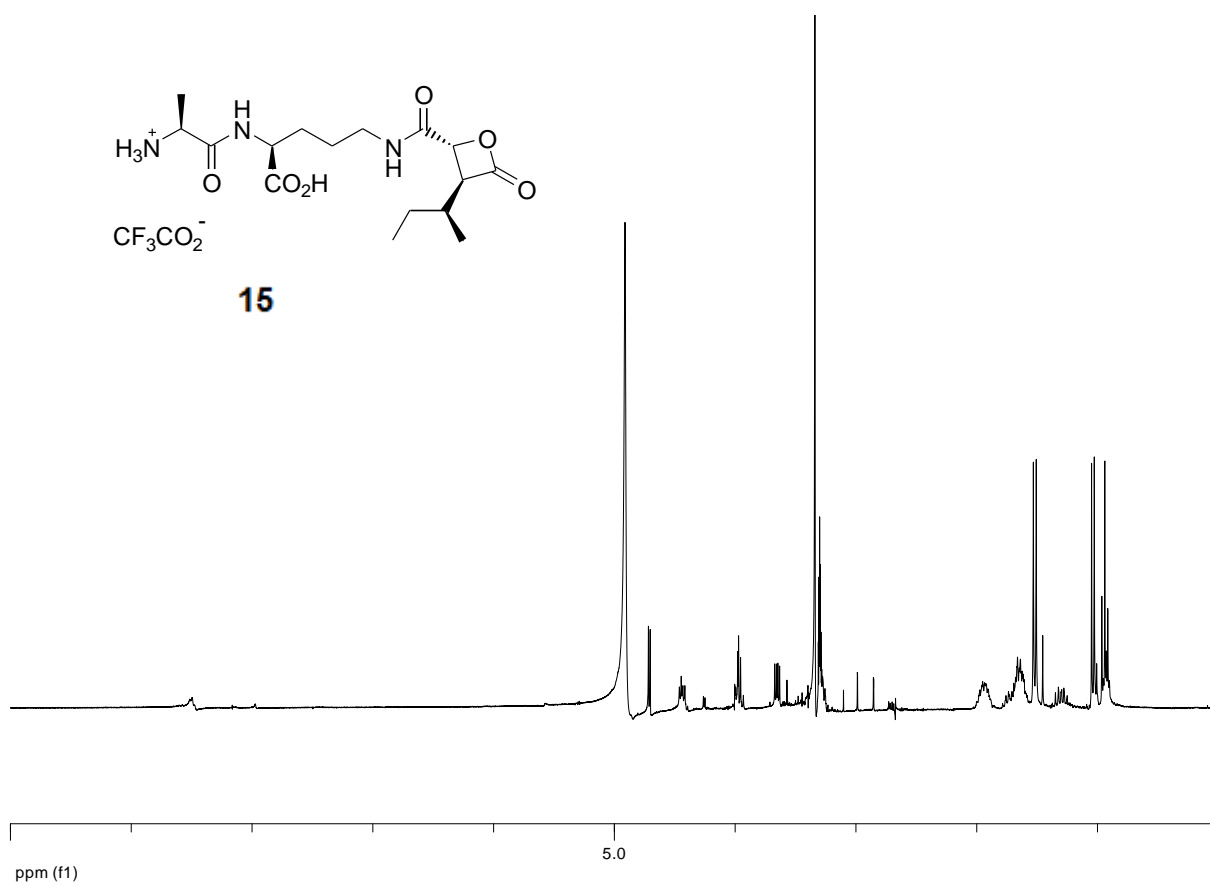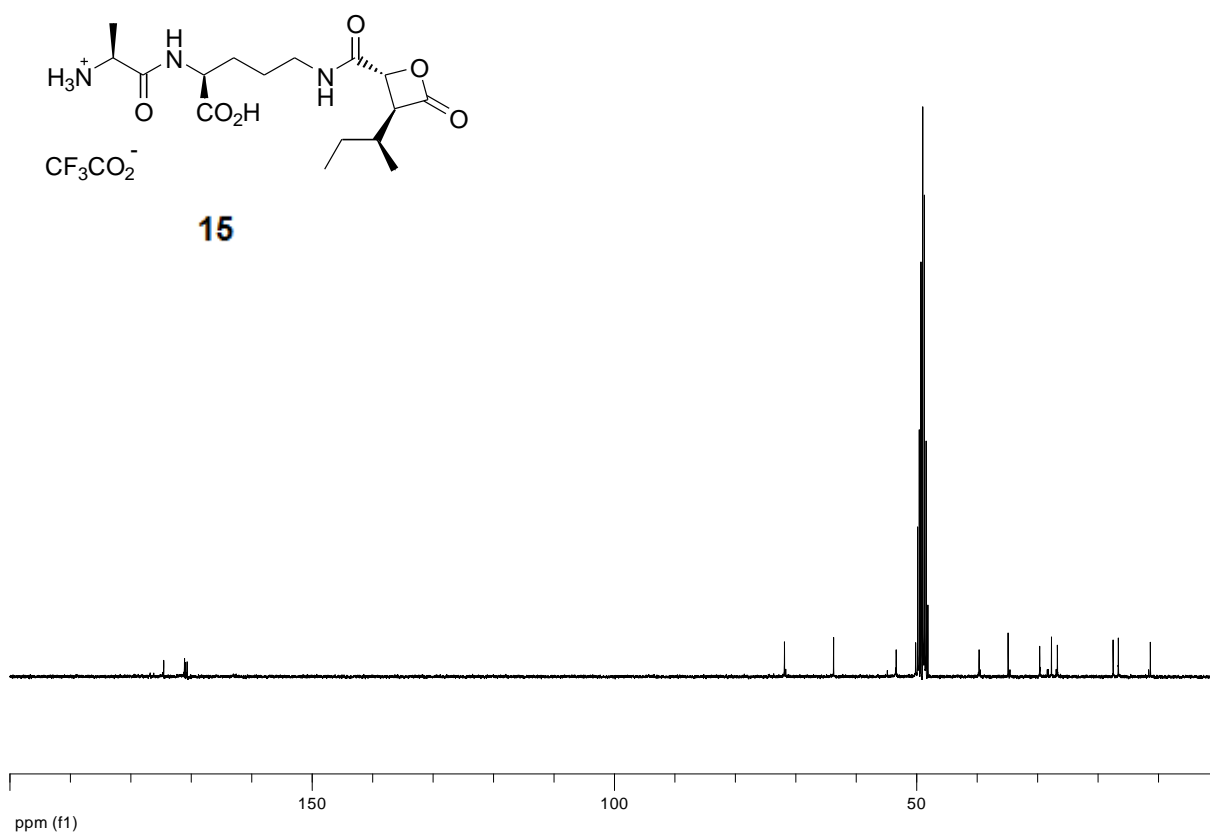

Supplement: c1ob05661a.pdf [file c1ob05661a.pdf]
